# Supplementary material
Source: publisher figshare collection journal article supplement (https://sage.figshare.com/ndownloader/files/16705382)
Supplement: Supplementary file 1 [file 16705382]

**Supplementary Table S3. Calibration results for *secondary model* simulation of adults with relapsing-onset MS, ages 30 to 74.**

|                                                        | EDSS 0-2.5                                                                                                                             | EDSS 3.0-5.5 | EDSS 6.0-7.5 | EDSS 8.0-9.5 |
|--------------------------------------------------------|----------------------------------------------------------------------------------------------------------------------------------------|--------------|--------------|--------------|
| Calibration targets (Table 2) for ARR by EDSS category | N/A                                                                                                                                    | <b>0.19</b>  | <b>0.12</b>  | <b>0.04</b>  |
|                                                        | No age-related decrease in ARR, maximum decrease in ARR by EDSS of 37% at EDSS scores 6.0-7.5 and 80% at 8.0-9.5 relative to 0-5.5     |              |              |              |
|                                                        | EDSS 0-2.5                                                                                                                             | EDSS 3.0-5.5 | EDSS 6.0-7.5 | EDSS 8.0-9.5 |
| Weighted ARR by p-y at EDSS category                   | 0.51                                                                                                                                   | <b>0.51</b>  | <b>0.14</b>  | <b>0.04</b>  |
|                                                        | Intermediate age-related decrease (24%/5y) in ARR, decreases in ARR of 37% at EDSS scores 6.0-7.5 and 80% at 8.0-9.5 relative to 0-5.5 |              |              |              |
| Weighted ARR by p-y at EDSS category                   | 0.30                                                                                                                                   | <b>0.22</b>  | <b>0.09</b>  | <b>0.02</b>  |
|                                                        | Final age-related decrease (27%/5y), 6% decrease in ARR at EDSS scores 6.0-7.5 and 71% in 8.0-9.5 relative to 0-5.5                    |              |              |              |
| Weighted ARR by p-y at EDSS category                   | 0.28                                                                                                                                   | <b>0.20</b>  | <b>0.12</b>  | <b>0.03</b>  |

Key: ARR= annualized relapse rate; EDSS= Expanded Disability Status Scale; N/A= not applicable; p-y= person-years. Calibration targets for ARR by EDSS score categories are bolded.
